# Supplementary material for: Theoretical investigation of benzodithiophene-based donor molecules in organic solar cells: from structural optimization to performance metrics
Source: Royal Society of Chemistry journal article supplement (doi:10.1039/d4ra04818k), 2024-01-01
Supplement: d4ra04818k1.pdf [file d4ra04818k1.pdf]

**“Theoretical Investigation of Benzodithiophene-Based Donor Molecules in Organic Solar Cells: From Structural Optimization to Performance Metrics”**

Syed Muhammad Kazim Abbas Naqvi,<sup>a,b,c</sup> Faheem Abbas,<sup>d</sup> Sadaf Bibi,<sup>e</sup> Muhammad Kamran Shehzad,<sup>f</sup> Norah Alhokbany,<sup>g</sup> Yanan Zhu,<sup>a,b</sup> Hui Long,<sup>a,h</sup> Roman B. Vasiliev,<sup>h</sup> Zahid Nazir <sup>\*a</sup> and Shuai Chang <sup>\*a,b</sup>

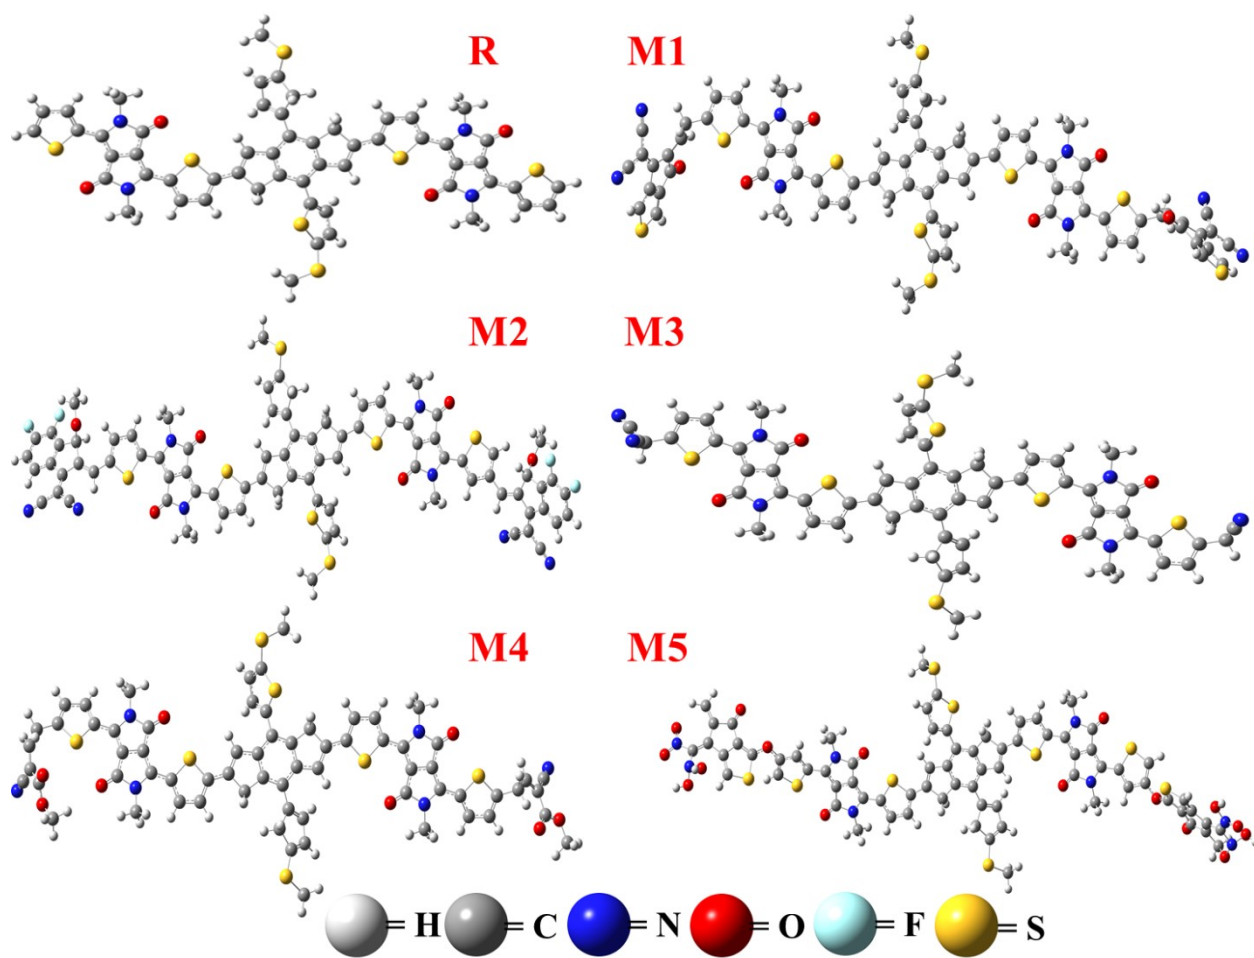

**Figure S1.** The representation of optimized geometry of Reference molecule R and designed molecules (M1-M5) using MPW1PW91/6-31G (d,p) level of theory.

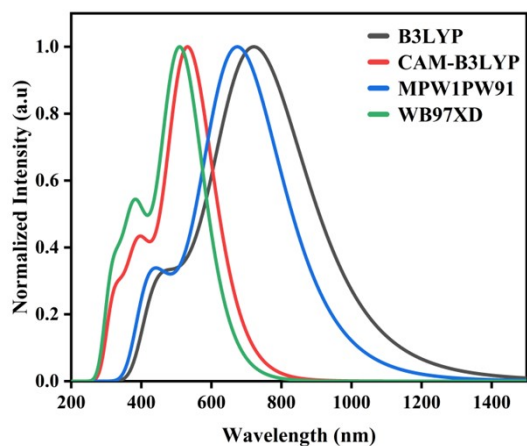

**Figure S2.** Comparison of four distinct functionals (B3LYP, CAMB3LYP, WB97XD, and MPW1PW91) using MPW1PW91/6-31G (d,p) level of theory.

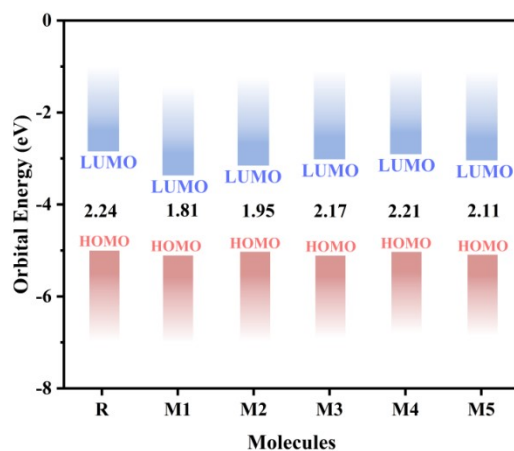

**Figure S3.** Energy of HOMO, LUMO, and the HOMO-LUMO gap using MPW1PW91/6-31G (d,p) functional for reference molecule R and designed molecules (M1-M5). All the energies are given in electron volts (eV).

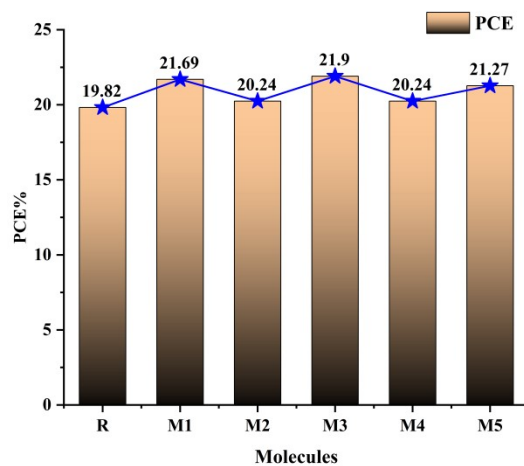

**Figure S4.** Graphically illustration of power conversion efficiency (PCE%) value of reference molecule R and designed molecules (M1-M5).

**Table S1.** Calculated absorption profile ( $\lambda_{\max}$ ), light harvesting efficiency (LHE), Excitation energy ( $E_x$ ), Oscillating strength ( $f$ ), percentage assignments ( $S_0$ - $S_1$ ) and Dipole moments ( $\mu$ ) for reference molecule R and deigned molecules (M1-M5) in polar solvent (dichloromethane).

| Molecules | $\lambda_{\max}$<br>Calculated<br>(nm) | $\lambda_{\max}$<br>Experimental<br>(nm) | LHE   | $E_x$<br>(eV) | $f$   | Assignment<br>$S_0$ - $S_1$ (%) | Dipole<br>moment<br>( $\mu$ ) |
|-----------|----------------------------------------|------------------------------------------|-------|---------------|-------|---------------------------------|-------------------------------|
| <b>R</b>  | 683                                    | 622                                      | 0.993 | 1.813         | 2.148 | H-L (98%)                       | 3.943                         |
| <b>M1</b> | 846                                    | ----                                     | 0.966 | 1.465         | 1.881 | H-L (97%)                       | 13.625                        |
| <b>M2</b> | 748                                    | ----                                     | 0.978 | 1.656         | 0.361 | H-L (97%)                       | 5.689                         |
| <b>M3</b> | 710                                    | ----                                     | 0.982 | 1.744         | 2.159 | H-L (97%)                       | 9.786                         |
| <b>M4</b> | 699                                    | ----                                     | 0.983 | 1.773         | 2.339 | H-L (97%)                       | 4.228                         |
| <b>M5</b> | 707                                    | ----                                     | 0.982 | 1.753         | 2.294 | H-L (97%)                       | 6.360                         |

**Table S2.** Calculated absorption profile ( $\lambda_{\max}$ ), light harvesting efficiency (LHE), Excitation energy ( $E_x$ ), Oscillating strength ( $f$ ), percentage assignments ( $S_0$ - $S_1$ ) and Dipole moments ( $\mu$ ) for reference molecule R and deigned molecules (M1-M5) in gas phase.

| Molecules | $\lambda_{\max}$<br>Calculated<br>(nm) | LHE   | $E_x$<br>(eV) | $f$   | Assignment<br>$S_0$ - $S_1$ (%) | Dipole<br>moment<br>( $\mu$ ) |
|-----------|----------------------------------------|-------|---------------|-------|---------------------------------|-------------------------------|
| <b>R</b>  | 650                                    | 0.989 | 1.905         | 1.982 | H-L (69%)                       | 3.143                         |
| <b>M1</b> | 791                                    | 0.985 | 1.567         | 1.845 | H-L (68%)                       | 10.625                        |
| <b>M2</b> | 832                                    | 0.239 | 1.489         | 0.119 | H-L (52%)                       | 4.212                         |
| <b>M3</b> | 677                                    | 0.990 | 1.830         | 2.023 | H-L (69%)                       | 7.723                         |
| <b>M4</b> | 670                                    | 0.991 | 1.849         | 2.207 | H-L (69%)                       | 4.042                         |
| <b>M5</b> | 650                                    | 0.989 | 1.905         | 1.982 | H-L (69%)                       | 4.862                         |

**Table S3.** Values of energy gap<sup>a</sup>, first singlet excitation energies<sup>b</sup>, exciton binding energies<sup>c</sup> of reference molecule R and designed molecules (M1-M5).

| Molecules | <sup>a</sup> $E_{H-L}$ (eV) | <sup>b</sup> $E_{Opt}$ (eV) | <sup>c</sup> $E_b$ (eV) |
|-----------|-----------------------------|-----------------------------|-------------------------|
| <b>R</b>  | 2.24                        | 1.81                        | 0.43                    |
| <b>M1</b> | 1.81                        | 1.46                        | 0.35                    |
| <b>M2</b> | 1.95                        | 1.65                        | 0.30                    |
| <b>M3</b> | 2.17                        | 1.74                        | 0.43                    |
| <b>M4</b> | 2.21                        | 1.77                        | 0.44                    |
| <b>M5</b> | 2.11                        | 1.75                        | 0.36                    |
